# Supplementary material
Source: bioRxiv or medRxiv preprint supplement (https://www.biorxiv.org/highwire/filestream/15415/field_highwire_adjunct_files/0/056069-1.pdf)
Supplement: Supplementary file [file 056069-1.pdf]

Supplementary table 1. Voxel clusters associated with the contrast of novel vs. repeated proverbs.

| Region                       | BA    | Hemi. | Peak MNI coordinates |     |     | BSR   | Spatial extent (mm <sup>3</sup> ) |
|------------------------------|-------|-------|----------------------|-----|-----|-------|-----------------------------------|
|                              |       |       | X                    | Y   | Z   |       |                                   |
| <b>Novel &gt; Repetition</b> |       |       |                      |     |     |       |                                   |
| <i>Frontal lobe</i>          |       |       |                      |     |     |       |                                   |
| Superior frontal g.          | 9     | R     | 4                    | 56  | 28  | 4.71  | 2944                              |
| <i>Temporal lobe</i>         |       |       |                      |     |     |       |                                   |
| Lateral temporal pole        | 21/38 | L     | -52                  | -4  | -20 | 4.89  | 29504                             |
| Anterior hippocampus         | -     | L     | -32                  | -12 | -20 | 3.72  |                                   |
| Broca's area                 | 44    | L     | -48                  | 8   | 24  | 4.53  |                                   |
| <i>Occipital lobe</i>        |       |       |                      |     |     |       |                                   |
| Occipital g.                 | 17/18 | R     | 28                   | -88 | 0   | 5.58  | 9088                              |
| Occipital g.                 | 17/18 | L     | -24                  | -96 | -8  | 9.70  | 121344                            |
| Wernicke's area              | 21/22 | L     | -52                  | -56 | 4   | 5.73  |                                   |
| Posterior fusiform g.        | 37    | L     | -36                  | -56 | -16 | 5.85  |                                   |
| Cerebellum                   | -     | L     | -16                  | -76 | -36 | 11.42 |                                   |
| Cerebellum                   | -     | L/R   | 0                    | -68 | -28 | 6.78  |                                   |
| <i>Subcortical and other</i> |       |       |                      |     |     |       |                                   |
| Hypothalamus                 | -     | L/R   | 0                    | 0   | -20 | 4.20  | 576                               |
| Substantia nigra             | -     | R     | 8                    | -24 | -12 | 3.72  | 1984                              |
| Cerebellum                   | -     | R     | 20                   | -28 | -40 | 3.98  | 1280                              |
| <b>Repetition &gt; Novel</b> |       |       |                      |     |     |       |                                   |
| <i>Frontal lobe</i>          |       |       |                      |     |     |       |                                   |
| Lateral frontal pole         | 10    | L     | -24                  | 60  | 8   | 6.11  | 41728                             |
| Lateral frontal pole         | 10    | R     | 36                   | 52  | -8  | 3.85  |                                   |
| Anterior cingulate g.        | 24/33 | L/R   | 4                    | 24  | 8   | 4.33  |                                   |
| Superior frontal g.          | 6     | R     | 24                   | 12  | 52  | 3.62  | 1728                              |
| <i>Parietal lobe</i>         |       |       |                      |     |     |       |                                   |
| Supramarginal g.             | 40    | R     | 60                   | -28 | 24  | 3.36  | 3072                              |
| Precuneus                    | 7     | L/R   | -8                   | -64 | 28  | 9.19  | 127360                            |
| Posterior cingulate g.       | 23/31 | L/R   | -8                   | -44 | 20  | 7.53  |                                   |
| Superior parietal l.         | 7     | R     | 20                   | -56 | 72  | 4.19  |                                   |
| Angular g.                   | 39    | L     | -44                  | -64 | 44  | 5.69  |                                   |
| Angular g.                   | 39    | R     | 44                   | -72 | 36  | 3.84  | 5376                              |

Note: Coordinates are displayed in MNI space.
